1 **Introducing RpsA Point Mutation  $\Delta$ 438A or D123A into the Chromosome of *M.***  
2 ***tuberculosis* Confirms its Role in Causing Resistance to Pyrazinamide**

3

4 Wanliang Shi<sup>1</sup>, Peng Cui<sup>1</sup>, Hongxia Niu<sup>2</sup>, Shuo Zhang<sup>1</sup>, Tone Tønjum<sup>3</sup>, Bingdong Zhu<sup>2</sup>, and  
5 Ying Zhang<sup>1\*</sup>

6

7 1 Department of Molecular Microbiology and Immunology, Bloomberg School of Public  
8 Health, Johns Hopkins University, Baltimore, Maryland, USA

9 2 Lanzhou Center for Tuberculosis Research and Institute of Pathogenic Biology & Gansu  
10 Provincial Key Laboratory of Evidence Based Medicine and Clinical Translation, School of  
11 Basic Medical Sciences, Lanzhou University, Lanzhou, China

12 3 Unit for Genome Dynamics, Department of Microbiology, Oslo University Hospital,  
13 University of Oslo, Norway

14

15 Running title: *rpsA* Mutation Causing Pyrazinamide Resistance

16

17 \*Corresponding author:

18 Ying Zhang, MD, PhD

19 Email: [yzhang@jhsp.edu](mailto:yzhang@jhsp.edu)

20

21

22

23 **ABSTRACT**

24 Pyrazinamide (PZA) is a unique frontline drug for shortening tuberculosis treatment, but its  
25 mechanisms of action are elusive. We previously identified RpsA as a target of PZA and found  
26 an alanine deletion at position 438 ( $\Delta 438A$ ) in RpsA associated with PZA resistance, but its  
27 role in PZA resistance is controversial. Here, we introduced RpsA mutation  $\Delta 438A$  or D123A  
28 into *M. tuberculosis* chromosome and demonstrated that the introduced RspA mutations are  
29 indeed responsible for PZA resistance.

30

31 **TEXT**

32 PZA is an important first-line drug that plays a unique role in shortening TB therapy from 9-  
33 12 months to 6 months due to its unique sterilizing activity in killing persisters that are not  
34 killed by other TB drugs (7, 29). Despite its high activity in vivo, PZA is a peculiar drug that  
35 has virtually no activity in vitro under normal culture conditions (19, 29), but is active at acid  
36 pH (6, 31). Recent studies of new drugs such as bedaquiline, PA-824, and moxifloxacin have  
37 highlighted the essentiality of PZA as these new agents mainly work in conjunction with PZA  
38 but cannot replace it (20, 21). Thus, PZA is a key drug that will likely play a major role in new  
39 drug regimens for treatment of TB and drug-resistant TB.

40

41 It is well established that mutations in the *pncA* gene encoding nicotinamidase/pyrazinamidase  
42 (PZase) involved in conversion of PZA to active form pyrazinoic acid (POA) are the major  
43 mechanism of PZA resistance (11, 32), accounting for 85% of all PZA resistance (32). However,  
44 some PZA-resistant strains without *pncA* mutations may have mutations in potential targets of

45 PZA, including ribosomal protein S1 (RpsA) involved in trans-translation (5, 9, 13, 17, 24),  
46 aspartate decarboxylase (PanD) (12, 27) involved in synthesis of  $\beta$ -alanine - a precursor for  
47 pantothenate and CoA biosynthesis, and ATP-dependent protease ClpC1(26, 28). We have  
48 previously identified a 3-base pair “GCC” deletion resulting in loss of an Alanine at amino  
49 acid 438 in RpsA in a low-level PZA-resistant clinical isolate DHM444 (MIC = 200 to 300  
50  $\mu$ g/ml PZA compared with 100  $\mu$ g/ml in susceptible *M. tuberculosis*) without *pncA* mutation  
51 (13). *rpsA* mutations are subsequently shown to be associated with PZA resistance in clinical  
52 strains (3, 14, 18). However, certain nonsynonymous mutations in RpsA protein (A364G) seem  
53 to occur in some PZA susceptible strains (1). In addition, a recent study by Dillon et al. claims  
54 that RpsA is not a target of PZA and that the RpsA  $\Delta$ 438A mutation does not cause PZA  
55 resistance (2). These discordant results raise doubts about RpsA being a target of PZA and the  
56 role of RpsA  $\Delta$ 438A mutation in PZA resistance.

57

58 In this study, to more convincingly address the role of the RpsA  $\Delta$ 438A mutation in PZA  
59 resistance, we transferred this mutation into the genome of *M. tuberculosis* H37Rv by  
60 homologous recombination. It is worth noting that the same strategy has been successfully used  
61 to demonstrate *inhA* and certain *embB* point mutations being responsible for INH and  
62 ethambutol resistance, respectively (10, 22). The RpsA  $\Delta$ 438A mutation was created by a two-  
63 step allelic exchange method as described (8). Briefly, a 3,440-bp fragment spanning the *rpsA*  
64  $\Delta$ 438A deletion mutation was amplified by PCR with DHM444 genomic DNA using primers  
65 containing HindIII and PacI restriction sites (underlined) in the forward primer (FrpsA 5’-  
66 CGGAAAGCTTCCACACCACGTTCAACCAGAC-3’ and reverse primer RrpsA 5’-

67 GCTTAATTAAGCACGCGCTTGTGCCACAGAG-3'), respectively. The PCR fragment was  
68 then cloned into the p2NIL vector followed by insertion of a PacI cassette containing the *sacB*  
69 and *lacZ*. The recombinant plasmid was transformed in *M. tuberculosis* H37Rv as described  
70 (12). The desired sucrose-resistant but kanamycin-susceptible transformants were analyzed by  
71 PCR and sequenced to confirm that the transformed *M. tuberculosis* has the correct RpsA  
72  $\Delta$ 438A mutation (Fig. 1). We determined the PZA MICs for the RpsA  $\Delta$ 438A mutant and the  
73 parent strain *M. tuberculosis* H37Rv using the proportion method and found them to be 200  
74  $\mu$ g/ml and 100  $\mu$ g/ml (pH5.8), respectively. In addition, we measured the PZA and POA MICs  
75 for the RpsA  $\Delta$ 438A mutant in liquid 7H9 medium (pH5.8) using microdilution method. The  
76 PZA MIC for the *M. tuberculosis* RpsA  $\Delta$ 438A mutant strain was 300  $\mu$ g/ml while the parent  
77 strain H37Rv was susceptible at this concentration (Fig. 2A). The POA MIC for the *M.*  
78 *tuberculosis* RpsA  $\Delta$ 438A mutant strain was 50  $\mu$ g/ml compared with 25  $\mu$ g/ml for the parent  
79 strain H37Rv (Fig. 2B). On the other hand, both strains had the same MIC for the control drugs  
80 isoniazid (INH) (0.03  $\mu$ g/ml) and rifampin (RIF) (0.12  $\mu$ g/ml) (Fig. 2C, 2D). These results  
81 clearly demonstrate that transfer of the RpsA  $\Delta$ 438A mutation into the genome of *M.*  
82 *tuberculosis* caused resistance to PZA and POA specifically, but not to INH and RIF. This  
83 provides conclusive evidence that the RpsA  $\Delta$ 438A mutation is indeed responsible for the PZA  
84 resistance in the strain DHM444.

85

86 In addition, in our previous study we found another low level PZA-resistant clinical isolate that  
87 has two *rpsA* mutations RpsA T5S and D123A with wild type *pncA* gene (13). To provide  
88 further proof that RpsA point mutations can cause PZA resistance, we constructed another

89 RpsA mutation D123A into the genome of *M. tuberculosis* H37Rv. Site-directed mutagenesis  
90 of *rpsA* was performed with primers S1D123AF 5'-  
91 GCTCAAGGAGAAGGCCGAGGCCGTCAAGG-3' and S1D123AR 5'-  
92 CCTTGACGGCCTCGGCCTTCTCCTTGAGC-3' using the QuikChange™ site-directed  
93 mutagenesis kit as described by the manufacturer (Agilent Technologies). Then the point  
94 mutation RpsA D123A was transferred to the parental strain *M. tuberculosis* H37Rv as described  
95 as above. We found that indeed the PZA MIC for the *M. tuberculosis* RpsA D123A mutant was  
96 increased by 2 fold (200 µg/ml PZA) compared with the parental strain *M. tuberculosis* H37Rv  
97 (100 µg/ml PZA) on 7H11 agar plate at pH5.8.

98

99 It is worth discussing the possible causes for the discrepant results between the Dillon et al.  
100 study (2) and ours. One possibility is the unusual and not accepted method used by that group  
101 to determine the PZA susceptibility by using OD<sub>600</sub> and MIC<sub>90</sub>. PZA susceptibility testing is  
102 notoriously difficult because of the acid pH requirement for drug activity and many factors  
103 affect the susceptibility results (30). The inability to observe PZA or POA resistance in their  
104 *rpsA* overexpression or point mutation strains could be attributed to the questionable method  
105 used in that study. Another argument used by Dillon et al. against the RpsA Δ438A mutation  
106 conferring PZA resistance (2) is that DHM444's PZA resistance could be due to defective  
107 PZase activity reported in a previous study (16). To address this question, we tested PZase  
108 activity for DHM444 as described (27) and found that contrary to the previous report (2), The  
109 PZA-resistant strain DHM444 still has PZase activity (Data not shown). Thus, the low level  
110 PZA resistance in DHM444 could not be attributed to defective PZase activity, and this study

111 provides clear evidence that its PZA resistance is most likely due to the RpsA  $\Delta$ 438A mutation  
112 (Fig. 2A, 2B).

113

114 That RpsA is a target of PZA (13) is supported by a number of observations including  
115 association of RpsA mutations and PZA resistance in clinical strains (3, 5, 9, 14, 18, 23), *rpsA*  
116 overexpression causing PZA resistance (13), as well as biochemical and structural studies  
117 showing the binding of the drug to the RpsA (4, 15, 25). Despite these supporting studies, and  
118 in view of the question about the role of RpsA $\Delta$ 438A mutation in PZA resistance, point  
119 mutation construction into the chromosome, though challenging, is by far the most convincing  
120 method to prove if a specific mutation is the cause for drug resistance. Our findings that the  
121 RpsA $\Delta$ 438A mutation and the D123A mutation when introduced into the *M.*  
122 *tuberculosis* chromosome are indeed responsible for PZA resistance provide further proof that  
123 RpsA is a real target of PZA. Future studies are needed to address the role of certain *rpsA*  
124 mutations in some seemingly “PZA-susceptible” strains by constructing more isogenic strains  
125 with *rpsA* mutations to determine whether they are involved in PZA resistance while others  
126 may not or may confer only borderline resistance that is easily mischaracterized as PZA  
127 susceptible due to insensitive PZA DST.

128

## 129 **ACKNOWLEDGMENTS**

130 This work was supported by NIH R01AI099512 and AMR-PART, Research Council of Norway.

131

132

133

134 **REFERENCES**

- 135 1. **Alexander, D. C., J. H. Ma, J. L. Guthrie, J. Blair, P. Chedore, and F. B. Jamieson.**  
136 2012. Gene sequencing for routine verification of pyrazinamide resistance in  
137 *Mycobacterium tuberculosis*: a role for *pncA* but not *rpsA*. *Journal of clinical*  
138 *microbiology* **50**:3726-8.
- 139 2. **Dillon, N. A., N. D. Peterson, H. A. Feaga, K. C. Keiler, and A. D. Baughn.** 2017.  
140 Anti-tubercular Activity of Pyrazinamide is Independent of trans-Translation and RpsA.  
141 *Sci Rep* **7**:6135.
- 142 3. **Gu, Y., X. Yu, G. Jiang, X. Wang, Y. Ma, Y. Li, and H. Huang.** 2016. Pyrazinamide  
143 resistance among multidrug-resistant tuberculosis clinical isolates in a national referral  
144 center of China and its correlations with *pncA*, *rpsA*, and *panD* gene mutations.  
145 *Diagnostic microbiology and infectious disease* **84**:207-11.
- 146 4. **Huang, B., J. Fu, C. Guo, X. Wu, D. Lin, and X. Liao.** 2016. (1)H, (15)N, (13)C  
147 resonance assignments for pyrazinoic acid binding domain of ribosomal protein S1  
148 from *Mycobacterium tuberculosis*. *Biomol NMR Assign* **10**:321-4.
- 149 5. **Khan, M. T., S. I. Malik, A. I. Bhatti, S. Ali, A. S. Khan, M. T. Zeb, T. Nadeem, and**  
150 **S. Fazal.** 2018. Pyrazinamide-resistant mycobacterium tuberculosis isolates from  
151 Khyber Pakhtunkhwa and *rpsA* mutations. *J Biol Regul Homeost Agents* **32**:705-709.
- 152 6. **McDermott, W., and R. Tompsett.** 1954. Activation of pyrazinamide and  
153 nicotinamide in acidic environment in vitro. *Am. Rev. Tuberc.* **70**:748-754.
- 154 7. **Mitchison, D. A.** 1985. The action of antituberculosis drugs in short-course  
155 chemotherapy. *Tubercle* **66**:219-25.
- 156 8. **Parish, T., and N. G. Stoker.** 2000. Use of a flexible cassette method to generate a  
157 double unmarked *Mycobacterium tuberculosis* *tlyA* *plcABC* mutant by gene  
158 replacement. *Microbiology* **146 ( Pt 8)**:1969-75.
- 159 9. **Ramirez-Busby, S. M., T. C. Rodwell, L. Fink, D. Catanzaro, R. L. Jackson, M.**  
160 **Pettigrove, A. Catanzaro, and F. Valafar.** 2017. A Multinational Analysis of  
161 Mutations and Heterogeneity in PZase, RpsA, and PanD Associated with Pyrazinamide  
162 Resistance in M/XDR *Mycobacterium tuberculosis*. *Sci Rep* **7**:3790.
- 163 10. **Safi, H., B. Sayers, M. H. Hazbon, and D. Alland.** 2008. Transfer of *embB* codon 306  
164 mutations into clinical *Mycobacterium tuberculosis* strains alters susceptibility to  
165 ethambutol, isoniazid, and rifampin. *Antimicrobial Agents and Chemotherapy* **52**:2027-  
166 34.
- 167 11. **Scorpio, A., and Y. Zhang.** 1996. Mutations in *pncA*, a gene encoding  
168 pyrazinamidase/nicotinamidase, cause resistance to the antituberculous drug  
169 pyrazinamide in *tubercle bacillus*. *Nat Med* **2**:662-7.
- 170 12. **Shi, W., J. Chen, J. Feng, P. Cui, S. Zhang, X. Weng, W. Zhang, and Y. Zhang.**  
171 2014. Aspartate decarboxylase (PanD) as a new target of pyrazinamide in  
172 *Mycobacterium tuberculosis*. *Emerg Microbes Infect* **3**:e58.
- 173 13. **Shi, W., X. Zhang, X. Jiang, H. Yuan, J. S. Lee, C. E. Barry, 3rd, H. Wang, W.**  
174 **Zhang, and Y. Zhang.** 2011. Pyrazinamide inhibits trans-translation in *Mycobacterium*

- 175 *tuberculosis*. Science **333**:1630-2.  
176
- 177 14. **Simons, S. O., A. Mulder, J. van Ingen, M. J. Boeree, and D. van Soolingen.** 2013.  
178 Role of rpsA Gene Sequencing in Diagnosis of Pyrazinamide Resistance. Journal of  
179 clinical microbiology **51**:382.
- 180 15. **Singh, A., P. Somvanshi, and A. Grover.** 2018. Pyrazinamide drug resistance in RpsA  
181 mutant (438A) of Mycobacterium tuberculosis: Dynamics of essential motions and  
182 free-energy landscape analysis. J Cell Biochem.
- 183 16. **Speirs, R. J., J. T. Welch, and M. H. Cynamon.** 1995. Activity of n-propyl  
184 pyrazinoate against pyrazinamide-resistant Mycobacterium tuberculosis: investigations  
185 into mechanism of action of and mechanism of resistance to pyrazinamide. Antimicrob  
186 Agents Chemother **39**:1269-71.
- 187 17. **Tan, Y., Z. Hu, T. Zhang, X. Cai, H. Kuang, Y. Liu, J. Chen, F. Yang, K. Zhang, S.  
188 Tan, and Y. Zhao.** 2014. Role of pncA and rpsA gene sequencing in detection of  
189 pyrazinamide resistance in Mycobacterium tuberculosis isolates from southern China.  
190 J Clin Microbiol **52**:291-7.
- 191 18. **Tan, Y., Z. Hu, T. Zhang, X. Cai, H. Kuang, Y. Liu, J. Chen, F. Yang, K. Zhang, S.  
192 Tan, and Y. Zhao.** 2014. Role of pncA and rpsA gene sequencing in detection of  
193 pyrazinamide resistance in Mycobacterium tuberculosis isolates from southern China.  
194 Journal of clinical microbiology **52**:291-7.
- 195 19. **Tarshis, M. S., and W. A. Weed, Jr.** 1953. Lack of significant in vitro sensitivity of  
196 Mycobacterium tuberculosis to pyrazinamide on three different solid media. Am. Rev.  
197 Tuberc. **67**:391-5.
- 198 20. **Tasneen, R., S. Y. Li, C. A. Peloquin, D. Taylor, K. N. Williams, K. Andries, K. E.  
199 Mdluli, and E. L. Nuermberger.** 2011. Sterilizing Activity of Novel TMC207- and  
200 PA-824-Containing Regimens in a Murine Model of Tuberculosis. Antimicrobial  
201 Agents and Chemotherapy **55**:5485-92.
- 202 21. **Tasneen, R., S. Tyagi, K. Williams, J. Grosset, and E. Nuermberger.** 2008.  
203 Enhanced bactericidal activity of rifampin and/or pyrazinamide when combined with  
204 PA-824 in a murine model of tuberculosis. Antimicrob Agents Chemother **52**:3664-8.
- 205 22. **Vilcheze, C., F. Wang, M. Arai, M. H. Hazbon, R. Colangeli, L. Kremer, T. R.  
206 Weisbrod, D. Alland, J. C. Sacchettini, and W. R. Jacobs, Jr.** 2006. Transfer of a  
207 point mutation in Mycobacterium tuberculosis inhA resolves the target of isoniazid. Nat  
208 Med **12**:1027-9.
- 209 23. **Werngren, J., E. Alm, and M. Mansjo.** 2017. Non-pncA Gene-Mutated but  
210 Pyrazinamide-Resistant Mycobacterium tuberculosis: Why Is That? Journal of clinical  
211 microbiology **55**:1920-1927.
- 212 24. **Werngren, J., E. Alm, and M. Mansjo.** 2017. Non pncA gene-mutated but  
213 pyrazinamide resistant M. tuberculosis, why is that? J Clin Microbiol.
- 214 25. **Yang, J., Y. Liu, J. Bi, Q. Cai, X. Liao, W. Li, C. Guo, Q. Zhang, T. Lin, Y. Zhao,  
215 H. Wang, J. Liu, X. Zhang, and D. Lin.** 2015. Structural basis for targeting the  
216 ribosomal protein S1 of Mycobacterium tuberculosis by pyrazinamide. Molecular  
217 microbiology **95**:791-803.
- 218 26. **Yee, M., P. Gopal, and T. Dick.** 2017. Missense Mutations in the Unfoldase ClpC1 of



- 219 the Caseinolytic Protease Complex Are Associated with Pyrazinamide Resistance in  
220 *Mycobacterium tuberculosis*. *Antimicrob Agents Chemother* **61**. DOI:  
221 10.1128/AAC.02342-16
- 222 27. **Zhang S, Chen J, Shi W, Liu W, Zhang WH, and Z. Y.** 2013. Mutations in *panD*  
223 encoding aspartate decarboxylase are associated with pyrazinamide resistance in  
224 *Mycobacterium tuberculosis*. *Emerging Microbes & Infections* **2**:e34;  
225 doi:10.1038/emi.2013.38.
- 226 28. **Zhang, S., J. Chen, W. Shi, P. Cui, J. Zhang, S. Cho, W. Zhang, and Y. Zhang.** 2017.  
227 Mutation in *clpC1* encoding an ATP-dependent ATPase involved in protein degradation  
228 is associated with pyrazinamide resistance in *Mycobacterium tuberculosis*. *Emerg*  
229 *Microbes Infect* **6**:e8.
- 230 29. **Zhang, Y., and D. Mitchison.** 2003. The curious characteristics of pyrazinamide: a  
231 review. *Int J Tuberc Lung Dis* **7**:6-21.
- 232 30. **Zhang, Y., S. Permar, and Z. Sun.** 2002. Conditions that may affect the results of  
233 susceptibility testing of *Mycobacterium tuberculosis* to pyrazinamide. *J Med Microbiol*  
234 **51**:42-49.
- 235 31. **Zhang, Y., A. Scorpio, H. Nikaido, and Z. Sun.** 1999. Role of acid pH and deficient  
236 efflux of pyrazinoic acid in unique susceptibility of *Mycobacterium tuberculosis* to  
237 pyrazinamide. *J Bacteriol* **181**:2044-2049.
- 238 32. **Zhang, Y., W. Shi, W. Zhang, and D. Mitchison.** 2014. Mechanisms of Pyrazinamide  
239 Action and Resistance. *Microbiol Spectrum*, ASM Press **2(4)**:July 2014, 2:2.4.03.  
240 doi:10.1128/microbiolspec.MGM2-0023-2013.
- 241
- 242
- 243
- 244
- 245
- 246
- 247
- 248
- 249
- 250
- 251
- 252
- 253
- 254
- 255
- 256
- 257
- 258
- 259
- 260
- 261

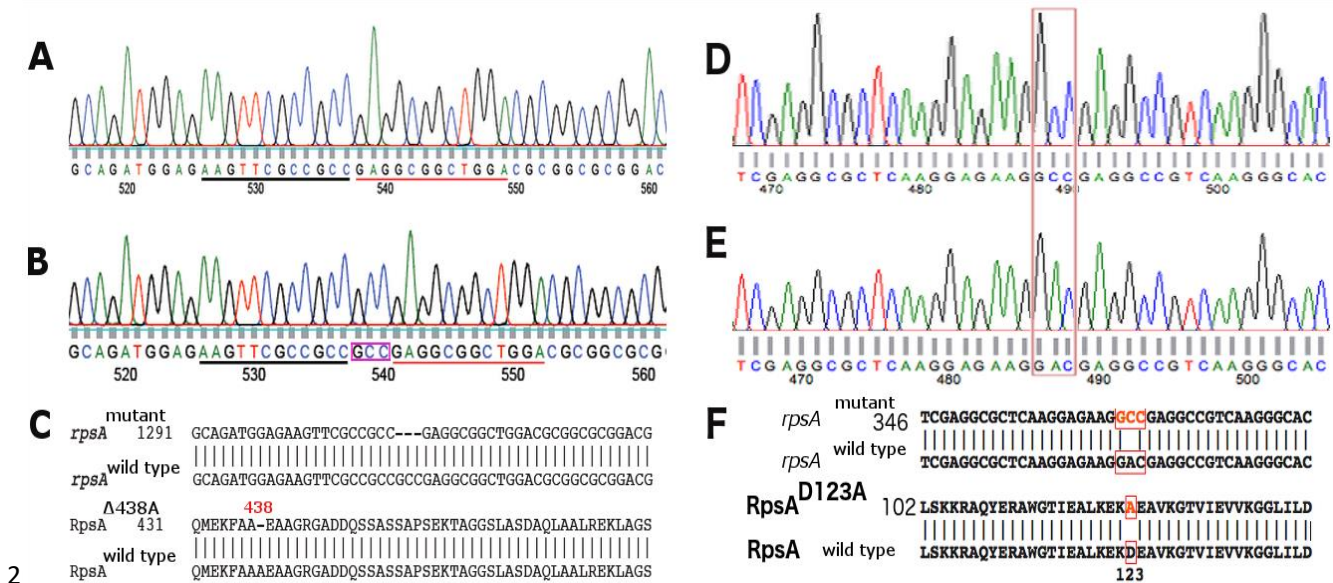

263  
264 Fig. 1. Confirmation of RpsA Δ438A and D123A point mutation construction by Sanger sequencing.

265 **A.** Chromatogram of partial *rpsA* sequence showing the “GCC” (coding for Alanine, A) deletion  
266 in the constructed RpsAΔ438A mutant from PZA-resistant strain DHM444. **B.** Chromatogram  
267 of partial *rpsA* sequence showing the presence of “GCC” (Alanine) in the *M. tuberculosis*  
268 H37Rv parent strain. **C.** Alignments of partial *rpsA* sequence from *M. tuberculosis* H37Rv wild  
269 type and the constructed RpsA Δ438A mutant at the nucleotide level (upper panel) and amino  
270 acid level (lower panel). **D** and **E.** Chromatogram of partial *rpsA* sequence showing “GAC”  
271 (wild type) change to “GCC” which is contained in one PZA-resistant clinical isolate. **F.**  
272 Alignments of partial *rpsA* sequence from *M. tuberculosis* H37Rv wild type and the constructed  
273 RpsA D123A mutant at the nucleotide level (upper panel) and amino acid level (lower panel).

274  
275  
276  
277  
278

279 A.

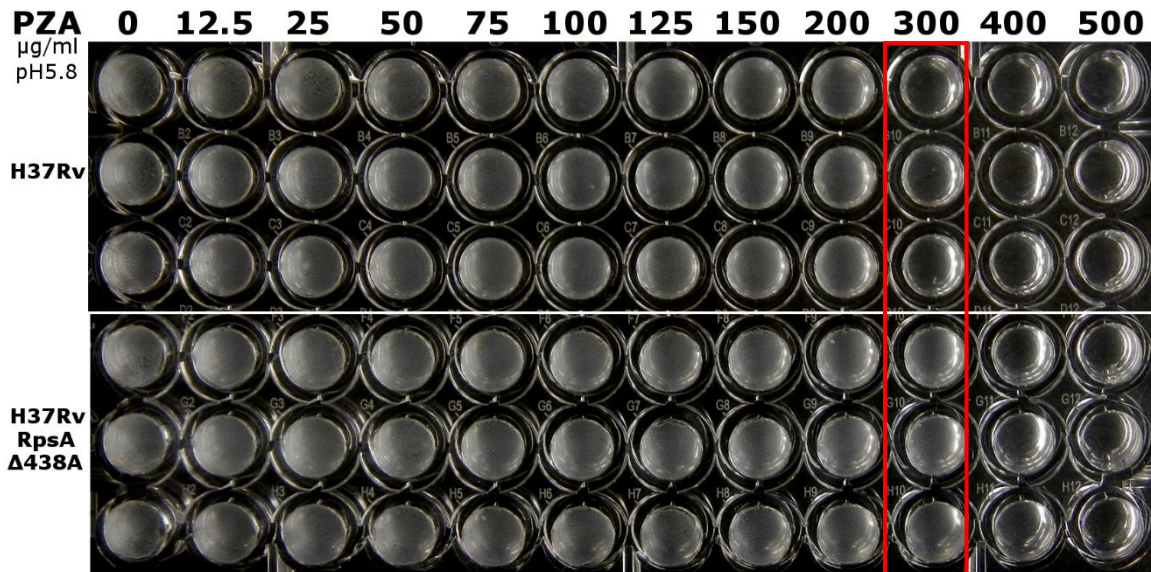

280

281 B.

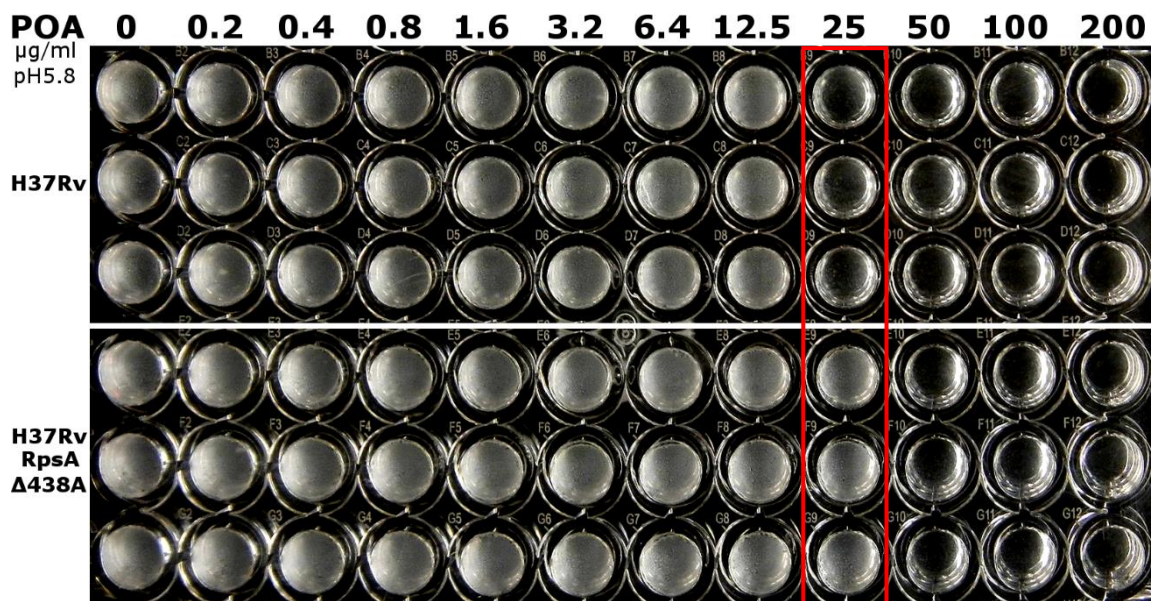

282

283

284

285

286

287

288

289 C.

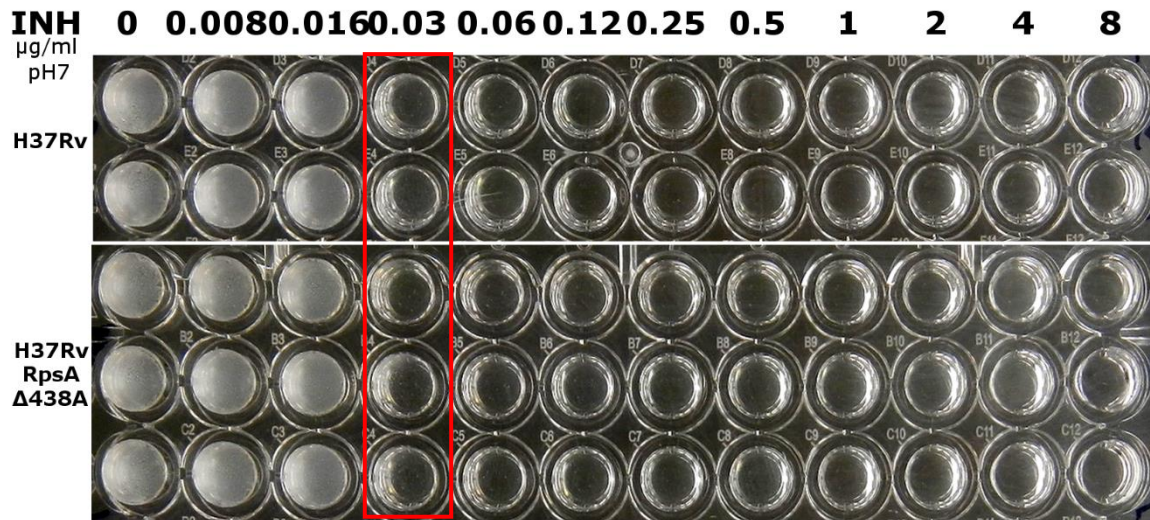

290

291 D.

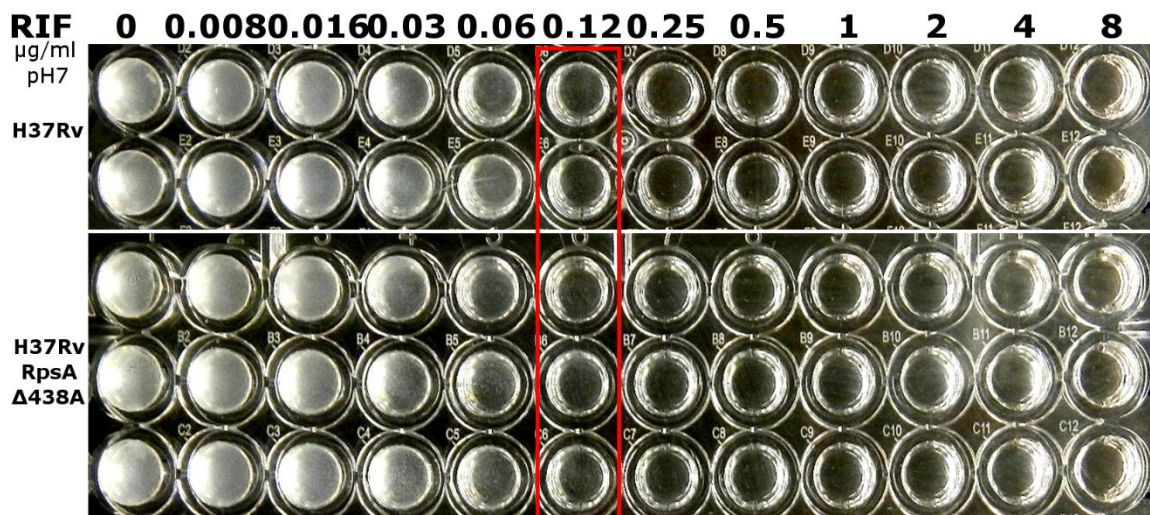

292

293 Fig. 2. Drug susceptibility testing (DST) results of the constructed RpsA Δ438A mutant strain  
294 compared with the control strain H37Rv. The drug susceptibility testing was performed in  
295 7H9/ADC broth using microdilution method with pH5.8 for PZA and POA DST, and pH 7.0  
296 for INH and RIF DST. The constructed RpsA Δ438A mutant strain was more resistant to PZA  
297 (A) and POA (B) than the control strain H37Rv but was as susceptible to INH (C) and RIF (D)  
298 as the control strain H37Rv. A. The PZA MIC of the *M. tuberculosis* H37Rv control strain was  
299 300 μg/ml while the *M. tuberculosis* RpsA Δ438A mutant strain was resistant at this

300 concentration. **B.** The POA MIC of *M. tuberculosis* H37Rv parent strain was 25 µg/ml while  
301 the POA MIC for the *M. tuberculosis* H37Rv RpsA Δ438A mutant strain was 50 µg/ml.  
302 **C.** Isoniazid (INH) MICs for the parent strain *M. tuberculosis* H37Rv and the *M. tuberculosis*  
303 H37Rv RpsA Δ438A mutant were the same (0.03 µg/ml). **D.** The RIF MICs for the parent  
304 strain *M. tuberculosis* H37Rv and the *M. tuberculosis* H37Rv RpsA Δ438A mutant were the  
305 same (0.12 µg/ml). The red boxes are used to highlight the difference in PZA and POA  
306 susceptibility between the RpsA Δ438A mutant strain and the parent strain H37Rv.

307

308
